# Supplementary material for: Serum Levels of Acylcarnitines and Amino Acids Are Associated with Liberation from Organ Support in Patients with Septic Shock
Source: MDPI journal article supplement (doi:10.3390/jcm11030627), 2022-01-26
Supplement: s1 [file s1]

## **Supplementary Material**

### **Understanding Metabolic Perturbations of Chronic Critical Illness in Mechanically Ventilated Patients with Septic Shock**

Theodore S. Jennaro, Elizabeth M. Viglianti, Nicholas E. Ingraham, Alan E. Jones, Kathleen A.  
Stringer, and Michael A. Puskarich\*

#### **Methods:**

*Definition of modified Charlson Comorbidity Index:* Patient demographics, comorbidities, and clinical outcomes were recorded and are maintained in a secure research electronic data capture (REDCap) database [1]. However, it was not possible to obtain all comorbidities necessary to calculate a full comorbidity score according to Charlson [2]. Specifically, we lacked information on peptic ulcer disease and connective tissues diseases and could not distinguish between uncomplicated diabetes vs. diabetes with residual organ damage or HIV positive vs. Acquired immunodeficiency syndrome. Thus, our modified scale assigns a score of +1 to any patient with documented diabetes and does not account for the remaining disease states.

## Results:

### Supplementary Table S1: Metabolites detected and quantified by LC-MS/MS and <sup>1</sup>H-NMR.

The Kyoto Encyclopedia of Genes and Genomes (KEGG) identification (ID) number is provided when available (+). When a corresponding KEGG ID does not exist, the human metabolomics database (HMDB) ID number is provided (\*). When neither a KEGG nor HMDB ID is available, a metabolite is assigned N/A. The missingness for NMR metabolites represents the percentage of samples for which that respective compound did not have a reported value.

| LC-MS/MS Metabolites         |                      | <sup>1</sup> H-NMR Metabolites |                      |             |
|------------------------------|----------------------|--------------------------------|----------------------|-------------|
| Compound Name                | KEGG ID <sup>+</sup> | Compound Name                  | KEGG ID <sup>+</sup> | Missingness |
| Levocarnitine                | C00318               | 2-Hydroxybutyrate              | C05984               | 0%          |
| Acetylcarnitine (C2)         | C02571               | 2-Oxoisocaproate               | C00233               | 17.4%       |
| Propanoylcarnitine (C3)      | C03017               | 3-Hydroxybutyrate              | C01089               | 2.2%        |
| Butanoylcarnitine (C4)       | C02862               | Acetylcarnitine (C2)           | C02571               | 2.2%        |
| Valerylcarnitine (C5)        | HMDB0013128*         | Alanine                        | C00041               | 0%          |
| Hexanoylcarnitine (C6)       | HMDB0000756*         | Betaine                        | C00719               | 2.2%        |
| C8:1-carnitine               | HMDB0013324*         | Levocarnitine                  | C00318               | 10.9%       |
| Octanoylcarnitine (C8)       | C02838               | Choline                        | C00114               | 19.6%       |
| C10:1-carnitine              | HMDB0240585*         | Citrate                        | C00158               | 15.2%       |
| Decanoylcarnitine (C10)      | C03299               | Creatine                       | C00300               | 0%          |
| C12:1-carnitine              | HMDB0013326*         | Creatinine                     | C00791               | 0%          |
| Dodecanoylcarnitine (C12)    | HMDB0002250*         | Glucose                        | C00221               | 0%          |
| C14:1-carnitine              | HMDB0002014*         | Glutamine                      | C00064               | 0%          |
| Tetradecanoylcarnitine (C14) | HMDB0005066*         | Glycine                        | C00037               | 0%          |
| C16:1-carnitine              | HMDB0006317*         | Histidine                      | C00135               | 8.7%        |
| C20:4-carnitine              | HMDB0006455*         | Isoleucine                     | C00407               | 15.2%       |
| C18:2-carnitine              | HMDB0006469*         | Lactate                        | C00186               | 0%          |
| C20:3-carnitine              | N/A                  | Leucine                        | C00123               | 0%          |
| Palmitoylcarnitine (C16)     | C02990               | Lysine                         | C00047               | 2.2%        |
| C18:1-carnitine              | HMDB0006464*         | Methionine                     | C00073               | 15.2%       |
| C20:2-carnitine              | N/A                  | Ornithine                      | C00077               | 26.1%       |
| Stearoylcarnitine (C18)      | HMDB0000848*         | Phenylalanine                  | C00079               | 0%          |
| C20:1-carnitine              | N/A                  | Proline                        | C00148               | 15.2%       |
| Arachidonoylcarnitine (C20)  | HMDB0006455*         | Propylene glycol               | C00583               | 0%          |
|                              |                      | Pyruvate                       | C00022               | 0%          |
|                              |                      | Tyrosine                       | C00082               | 0%          |
|                              |                      | Valine                         | C00183               | 0%          |

**Supplementary Table S2: Patient characteristics.**

| <b>Patient Characteristic</b>                                                                  | <b>N = 47</b>      |
|------------------------------------------------------------------------------------------------|--------------------|
| Age (years) <sup>1</sup>                                                                       | 61 (46, 70)        |
| Sex <sup>2</sup>                                                                               |                    |
| Female                                                                                         | 21 (45%)           |
| Male                                                                                           | 26 (55%)           |
| Race <sup>2</sup>                                                                              |                    |
| African American                                                                               | 14 (30%)           |
| Caucasian                                                                                      | 32 (70%)           |
| Unknown                                                                                        | 1                  |
| Charlson Comorbidity Index <sup>1</sup>                                                        | 4.00 (2.00, 5.50)  |
| Heart Rate (beats/minute) <sup>1</sup>                                                         | 103 (94, 113)      |
| Respiratory Rate (breaths/minute) <sup>1</sup>                                                 | 20.0 (16.5, 25.0)  |
| Cumulative vasopressor index <sup>1</sup>                                                      | 4.00 (4.00, 8.00)  |
| Unknown                                                                                        | 1                  |
| Body mass index <sup>1</sup>                                                                   | 27 (22, 35)        |
| SOFA score <sup>1,3</sup>                                                                      | 9.00 (8.00, 11.00) |
| White blood count (cells/mm <sup>3</sup> ) <sup>1</sup>                                        | 24 (12, 31)        |
| Unknown                                                                                        | 13                 |
| Platelet (cells/mm <sup>3</sup> ) <sup>1</sup>                                                 | 147 (126, 214)     |
| Unknown                                                                                        | 1                  |
| Creatinine (mg/dL) <sup>1</sup>                                                                | 1.60 (1.16, 2.33)  |
| Total bilirubin (mg/dL) <sup>1</sup>                                                           | 1.30 (0.60, 3.30)  |
| Clinical lactate (mmol/L) <sup>1</sup>                                                         | 3.60 (2.30, 6.50)  |
| Unknown                                                                                        | 10                 |
| <sup>1</sup> Median (IQR)<br><sup>2</sup> N (%)<br><sup>3</sup> Neurological component removed |                    |

**Supplementary Table S3:** One-way analysis of variance (ANOVA) for differences in metabolite concentrations stratified by patient outcomes. The ANOVA p-values were corrected for multiple comparisons according to the false discovery rate (FDR) procedure of Benjamini–Hochberg. For metabolites with an FDR <0.05, post-hoc testing for between group differences was done according to Fisher’s Least Square Difference and reported when significant (FDR <0.05). CCI = chronic critical illness; RR = rapid recovery.

| Metabolite                   | F-Value | P-Value  | FDR      | Post-hoc Testing            |
|------------------------------|---------|----------|----------|-----------------------------|
| C16:1-carnitine              | 14.38   | 1.65E-05 | 8.43E-04 | Death vs. CCI; Death vs. RR |
| C14:1-carnitine              | 12.36   | 5.75E-05 | 1.47E-03 | Death vs. CCI; Death vs. RR |
| Dodecanoylcarnitine (C12)    | 11.56   | 9.61E-05 | 1.63E-03 | Death vs. CCI; Death vs. RR |
| Tetradecanoylcarnitine (C14) | 10.95   | 1.43E-04 | 1.83E-03 | Death vs. CCI; Death vs. RR |
| Palmitoylcarnitine (C16)     | 10.20   | 2.38E-04 | 2.42E-03 | Death vs. CCI; Death vs. RR |
| Acetylcarnitine (C2, LC-MS)  | 9.69    | 3.35E-04 | 2.82E-03 | Death vs. CCI; Death vs. RR |
| Decanoylcarnitine (C10)      | 9.22    | 4.66E-04 | 2.82E-03 | Death vs. CCI; Death vs. RR |
| C12:1-carnitine              | 9.10    | 5.05E-04 | 2.82E-03 | Death vs. CCI; Death vs. RR |
| C20:2-carnitine              | 9.04    | 5.29E-04 | 2.82E-03 | Death vs. CCI; Death vs. RR |
| C18:1-carnitine              | 8.97    | 5.53E-04 | 2.82E-03 | Death vs. CCI; Death vs. RR |
| C18:2-carnitine              | 8.32    | 8.79E-04 | 4.08E-03 | Death vs. CCI; Death vs. RR |
| C20:1-carnitine              | 7.93    | 1.17E-03 | 4.97E-03 | Death vs. CCI; Death vs. RR |
| Acetylcarnitine (C2, NMR)    | 7.81    | 1.28E-03 | 5.02E-03 | Death vs. RR                |
| Stearoylcarnitine (C18)      | 7.06    | 2.23E-03 | 8.13E-03 | Death vs. CCI; Death vs. RR |
| C20:3-carnitine              | 6.62    | 3.11E-03 | 1.06E-02 | Death vs. CCI; Death vs. RR |
| Proline                      | 6.41    | 3.66E-03 | 1.17E-02 | CCI vs. RR; Death vs. RR    |
| C10:1-carnitine              | 5.68    | 6.48E-03 | 1.94E-02 | Death vs. CCI; Death vs. RR |
| Octanoylcarnitine (C8)       | 5.45    | 7.80E-03 | 2.03E-02 | Death vs. CCI; Death vs. RR |
| Glycine                      | 5.43    | 7.90E-03 | 2.03E-02 | CCI vs. RR; Death vs. RR    |
| C20-carnitine                | 5.42    | 7.95E-03 | 2.03E-02 | Death vs. CCI; Death vs. RR |
| Propanoylcarnitine (C3)      | 5.05    | 1.07E-02 | 2.60E-02 | Death vs. RR                |
| Glutamine                    | 4.61    | 1.53E-02 | 3.55E-02 | CCI vs. RR; Death vs. RR    |
| Methionine                   | 4.32    | 1.95E-02 | 4.32E-02 | CCI vs. RR; Death vs. RR    |
| C20:4-carnitine              | 4.11    | 2.32E-02 | 4.93E-02 | Death vs. CCI               |
| L-Carnitine (LC-MS)          | 4.03    | 2.48E-02 | 5.06E-02 | NA                          |
| Valerylcarnitine (C5)        | 3.76    | 3.13E-02 | 6.14E-02 | NA                          |
| L-carnitine (NMR)            | 3.46    | 4.05E-02 | 7.65E-02 | NA                          |
| Betaine                      | 3.25    | 4.83E-02 | 8.81E-02 | NA                          |
| Propylene Glycol             | 3.09    | 5.56E-02 | 9.77E-02 | NA                          |
| Alanine                      | 2.94    | 6.36E-02 | 1.08E-01 | NA                          |
| Citrate                      | 2.78    | 7.31E-02 | 1.20E-01 | NA                          |
| 3-Hydroxybutyrate            | 2.55    | 8.98E-02 | 1.43E-01 | NA                          |
| Tyrosine                     | 2.45    | 9.80E-02 | 1.52E-01 | NA                          |
| Phenylalanine                | 2.34    | 1.08E-01 | 1.63E-01 | NA                          |
| Choline                      | 2.05    | 1.42E-01 | 2.06E-01 | NA                          |

|                        |      |          |          |    |
|------------------------|------|----------|----------|----|
| Leucine                | 1.87 | 1.67E-01 | 2.37E-01 | NA |
| Histidine              | 1.82 | 1.75E-01 | 2.41E-01 | NA |
| 2-Hydroxybutyrate      | 1.69 | 1.97E-01 | 2.58E-01 | NA |
| Butanoylcarnitine (C4) | 1.65 | 2.03E-01 | 2.58E-01 | NA |
| Hexanoylcarnitine (C6) | 1.65 | 2.04E-01 | 2.58E-01 | NA |
| Lysine                 | 1.63 | 2.07E-01 | 2.58E-01 | NA |
| Valine                 | 1.50 | 2.34E-01 | 2.84E-01 | NA |
| Lactate                | 1.38 | 2.62E-01 | 3.10E-01 | NA |
| C8:1-carnitine         | 1.05 | 3.60E-01 | 4.17E-01 | NA |
| Glucose                | 0.81 | 4.52E-01 | 5.12E-01 | NA |
| Isoleucine             | 0.77 | 4.70E-01 | 5.21E-01 | NA |
| Creatine               | 0.70 | 5.02E-01 | 5.45E-01 | NA |
| Pyruvate               | 0.60 | 5.53E-01 | 5.88E-01 | NA |
| Ornithine              | 0.25 | 7.78E-01 | 8.09E-01 | NA |
| 2-Oxoisocaproate       | 0.12 | 8.89E-01 | 9.07E-01 | NA |
| Creatinine             | 0.07 | 9.32E-01 | 9.32E-01 | NA |

**Supplementary Figure S1. Principal component analysis (PCA) stratified by patient outcomes.** The first three principal components explained ~62% variation; 33.9% (PC1), 18.4% (PC2), and 9.3% (PC3). Patients who required at least 14 days of mechanical ventilation or vasopressors were classified as chronic critical illness ('CCI', blue circles) and were more similar to patients who experienced rapid recovery ('Rapid-Recovery', purple diamonds) than patients who died at or prior to 28 days ('Competing-Death', orange triangles).

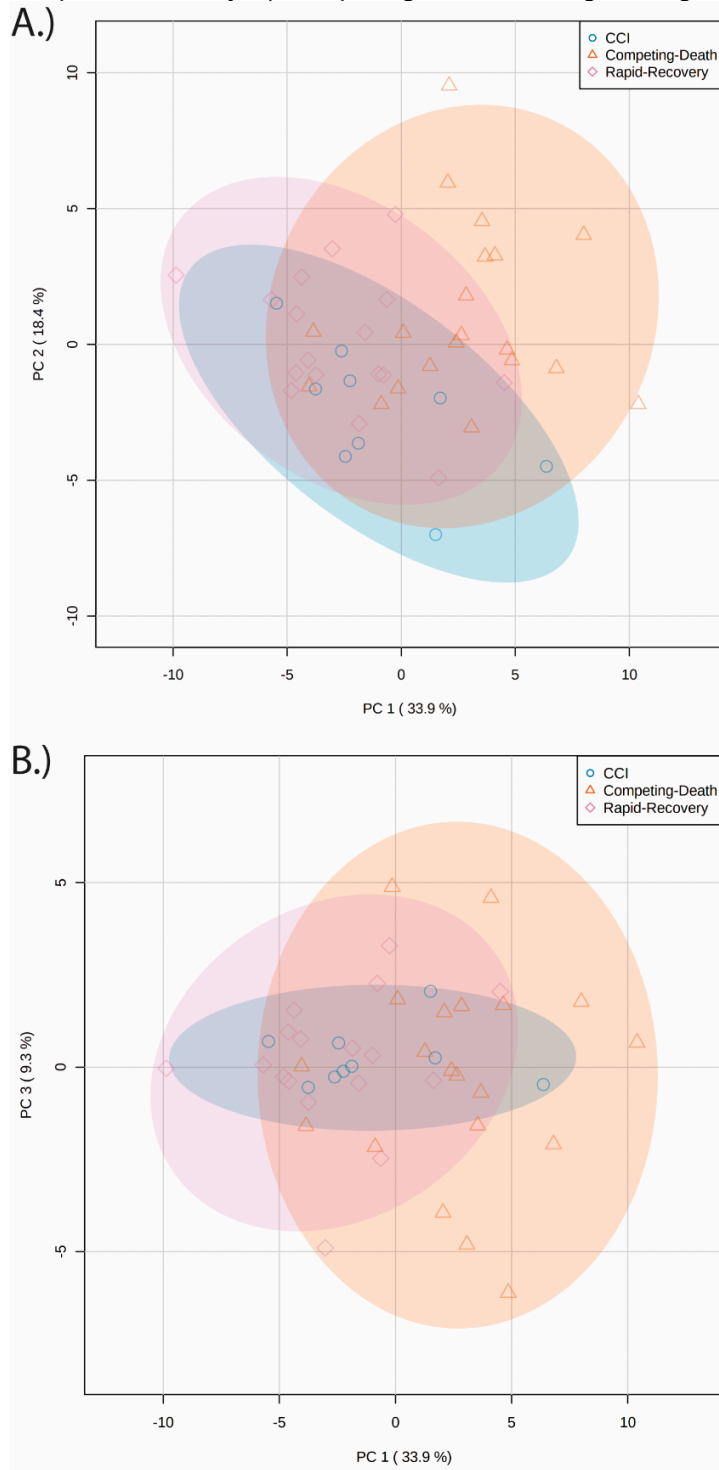

**References:**

1. Harris PA, Taylor R, Thielke R, Payne J, Gonzalez N, Conde JG. Research electronic data capture (REDCap)--a metadata-driven methodology and workflow process for providing translational research informatics support. *J Biomed Inform.* 2009;42(2):377-81. Epub 2008/10/22. doi: 10.1016/j.jbi.2008.08.010. PubMed PMID: 18929686; PubMed Central PMCID: PMC2700030.
2. Charlson ME, Pompei P, Ales KL, MacKenzie CR. A new method of classifying prognostic comorbidity in longitudinal studies: development and validation. *J Chronic Dis.* 1987;40(5):373-83. Epub 1987/01/01. doi: 10.1016/0021-9681(87)90171-8. PubMed PMID: 3558716.
